# Supplementary material for: Tin-mediated synthesis of lyso-phospholipids
Source: Royal Society of Chemistry journal article supplement (doi:10.1039/b604636c), 2006-01-01

# TIN MEDIATED SYNTHESIS OF *lyso*-PHOSPHOLIPIDS

Ezio Fasoli, Alberto Arnone, Antonio Caligiuri, Paola D'Arrigo, Lorenzo de Ferra,  
Stefano Servi\* Dipartimento di Chimica, Materiali, Ingegneria Chimica *G. Natta*, Politecnico di  
Milano, Via Mancinelli 7, 20131, Milano Italy Tel: +39 2 23993047 Fax: +39 2 23993080

## SUPPLEMENTARY DATA

Table of content:

General experimental procedures and apparatus (EXPERIMENTAL)

Detailed experimental conditions for the preparation of:

### **1-O-hexadecanoyl-*sn*-glycero-3-phosphocholine (1-O-Palm-PC)**

- a) in methanol with 2 eq of acylating agent*
- b) in 2-propanol with the intermediate preformed in methanol with 1.2 eq of acylating agent*
- c) in 2-propanol with 1.2 eq of acylating agent*
- d) in 2-propanol with 1.2 eq of acylating agent and a catalytic amount of tin species (DBTO, 5 mol %)*
- e) in 2-propanol with 1.2 eq of acylating agent and a catalytic amount of tin species (DMTDMeO), 5 mol %)*

### **1-O-octadecanoyl-*sn*-glycero-3-phosphocholine**

### **1-O-oleoyl-*sn*-glycero-3-phosphocholine**

### **1-O-dodecanoyl-*sn*-glycero-3-phosphocholine**

### **1-O-hexadecanoyl-*sn*-glycero-3-phosphoric acid DMAP salt**

Copy of <sup>1</sup>H and <sup>13</sup>C NMR spectra.

Copy of ESI MS spectra.

Typical HPLC trace for a sample reaction at different reaction times.

## EXPERIMENTAL

HPLC analyses were performed on a apparatus fitted with a diol 5  $\mu\text{m}$  column, length/internal diameter 125/4 and an evaporative light scattering detector. The operating conditions of the light scattering were 60 °C and 3.5 bar with a column temperature was 55 °C. A binary solvent system of hexane/isopropanol/acetic acid/triethylamine (84.4/14/1.5/0.08, v/v/v/v) (solvent A) and isopropanol/water/acetic acid/triethylamine (84.4/14/1.5/0.08, v/v/v/v) (solvent B) was used in a gradient mode starting from 60% A, 40% B ramping to 100% B in 10 minutes. 20  $\mu\text{l}$  samples of a methanolic solution 1 mg/ml were injected into the column at a mobile phase flow rate of 1.5 ml/min. Rt: DPPC 1.3 min; 1-acyl-2-*lyso*PA 4.6 min; 2-acyl-1-*lyso*PC 4.9 min; 1-acyl-2-*lyso*PC 5.1; GPC 12; GPA 9.8.  $^1\text{H}$  NMR,  $^{13}\text{C}$  NMR were recorded in  $\text{CDCl}_3$  or  $\text{CD}_3\text{OD}$  on a 250 or 400 MHz apparatus with TMS as an internal std.  $^1\text{H}$  NMR,  $^{13}\text{C}$  NMR spectra were identical with the one reported in the literature<sup>9e, 20</sup>

### **1-O-hexadecanoyl-*sn*-glycero-3-phosphocholine (1-O-Palm-PC)**

*a) in methanol with 2 eq of acylating agent*

To a stirred solution of GPC (10g, 0.039 mol) in methanol (200 ml), di-butyl tin oxide (10.65 g, 0.043 mol) was added at room temperature. The mixture was stirred under reflux until the reaction became clear (1 h). The resulting solution was cooled to 0° C in an ice bath and TEA (10.83 ml, 0.078 mol) and PalmCl (21.45g, 0.078 mol) were added dropwise to the solution.

After addition was complete the reaction was stirred at room temperature for a period of 15 min. A sample of the reaction mixture was analysed (HPLC) and shown to contain 1-palmitoyl-*sn*-2-*lyso*-phosphatidylcholine (66%) and GPC (34%) as the only phospholipids.

*b) in 2-propanol with the intermediate preformed in methanol with 1.2 eq of acylating agent*

To a stirred solution of GPC (10g, 39 mmol) in methanol (200 ml), di-butyl tin oxide (10.65 g, 43 mmol) was added at room temperature. The mixture was stirred under reflux until the reaction became clear (1 h). The solvent was removed under vacuum and the residue suspended in 2-PrOH (200 ml). The solvent was again removed in vacuum and the residue resuspended in 2-PrOH (400 ml). The mixture was then treated at rt with TEA (6.5 ml, 47 mmol, 1.2 eq) and palmitoyl chloride (12.8 g, 47 mmol, 1.2 eq.). After the addition was complete the reaction was stirred at room temperature for a period of 15 min. A sample of the reaction mixture was analysed (HPLC) and shown to contain 1-palmitoyl-*sn*-2-lyso-phosphatidylcholine ( 97%) and GPC ( 3%) as the only phospholipids.

*c) in 2-propanol with 1.2 eq of acylating agent*

GPC (10 g, 39 mmol) and DBTO (10.65 g, 43 mmol) were suspended in 400 ml of 2-propanol and refluxed for 1h. The mixture was cooled at 25°C and treated with TEA (6.5 ml, 47 mmol) and palmitoyl chloride (12.8 g, 47 mmol). The formation of the lysoPC and the disappearance of GPC was followed by HPLC. After 15 min at rt, the conversion was 97%.

The solution was treated with 400 ml of water and extracted with heptane (400 ml). The aqueous/alcoholic solution was extracted again with heptane (3 x 250 ml) dried and evaporated. The residue was dissolved and precipitated in acetone to give 15 g of a white powder (80%). A sample of the reaction mixture was analysed (HPLC) and shown to contain 1-palmitoyl-*sn*-2-lyso-phosphatidylcholine ( 97%) and GPC ( 3%) as the only phospholipids.

*d) in 2-propanol with 1.2 eq of acylating agent and a catalytic amount of tin species (DBTO, 5 mol %)*

A suspension of GPC 10 g (0.039 mol ) and dibutyltin oxide (0.5 g, 2 mmol) in 2-propanol (400 ml) was heated under reflux for 1h. The mixture was cooled at 25°C and treated with TEA (6.5 ml, 47 mmol) and palmitoyl chloride (12.8 g, 47 mmol). After addition was complete the reaction was

stirred at room temperature for a period of 15 min. A sample of the reaction mixture was analysed (HPLC) and shown to contain 1-palmitoyl-*sn*-2-lyso-phosphatidylcholine and GPC in a ratio 88 : 12.

*e) in 2-propanol with 1.2 eq of acylating agent and a catalytic amount of tin species (DMTDMeO), 5 mol %)*

A suspension of GPC 10 g (0.039 mol) and dibutyl-tin dimethoxide (2.8 g, 0.008 mol) in 2-propanol (400 ml) was heated under reflux for 1h. The mixture was cooled at 25°C and treated with TEA (6.5 ml, 47 mmol) and palmitoyl chloride (12.8 g, 47 mmol). After addition was complete the reaction was stirred at room temperature for a period of 15 min. A sample of the reaction mixture was analysed (HPLC) and shown to contain 1-palmitoyl-lyso-phosphatidylcholine and GPC in a ratio 89 : 11. Analytical samples were obtained by column chromatography.

<sup>1</sup>HNMR (400 MHz, CD<sub>3</sub>OD) 0.90 (t, J = 6.7 Hz, 3H), 1.20 (m, 24H), 1.62 (m, 2H), 2.35 (t, J = 7.4 Hz, 2H), 3.23 (s, 9H), 3.65 (m, 2H), 3.89 (m, 2H), 3.97 (m, 1H), 4.11 (dd, J = 11.5 and 6 Hz 1H), 4.18 (dd, J = 11.5 and 4.5 Hz, 1H) 4.30(m, 2H).

<sup>13</sup>CNMR (100 MHz CD<sub>3</sub>OD) 14.4, 23.6, 26.0, 30.2, 30.3, 30.5, 30.6, 32.9, 34.9, 54.9 (t, J = 3.8 Hz), 60.4 (d, J = 5.2 Hz) 66.3, 67.6 (dt, J = 7.0 and 3.5 Hz), 67.9 (d, J = 5.6 Hz), 70.0 (d, J = 7.2 Hz), 175.2.

### **1-O-octadecanoyl-*sn*-glycero-3-phosphocholine**

A suspension of GPC 1.85 g (7.2 mmol) and dibutyltin oxide (1.90 g, 7.6 mmol) in 2-propanol (30 ml) was heated under reflux for 1h. The resulting suspension was then cooled to 25° C in an ice bath and TEA (1.2 ml, 7.9 mmol) and stearoylchloride (2.3 g 7.9 mmol) were added. The reaction was stirred for 35 min at room temperature. A sample of the reaction mixture was analysed (HPLC) and shown to contain 1-stearoyl-LPC and GPC in a ratio 95 : 5. Isolation of the product was effected as previously described for the palmitoyl analogue. <sup>1</sup>HNMR (400 MHz, CD<sub>3</sub>OD) 0.90

(t, J = 6.7 Hz, 3H), 1.20-1.40 (m, 28H), 1.62 (m, 2H), 2.35 (t, J = 7.4 Hz, 2H), 3.23 (s, 9H), 3.65 (m, 2H), 3.89 (m, 2H), 3.97 (m, 1H), 4.11 (dd, J = 11.5 and 6 Hz 1H), 4.18 (dd, J = 11.5 and 4.5 Hz, 1H), 4.30(m, 2H).

<sup>13</sup>CNMR (62.9 MHz, CD<sub>3</sub>OD) 14.7, 23.7, 26.0, 30.2, 30.5, 30.6, 30.8, 33.1, 34.9, 54.7 (t, J= 3.5 Hz), 60.5 (d, J = 3.8 Hz), 66.2, 67.4 (dt, J = 7.0 and 3.5 Hz), 67.9 (d, J= 6.0 Hz), 69.8 (d, J = 8.0 Hz) , 175.3.

### **1-O-oleoyl-*sn*-glycero-3-phosphocholine**

A suspension of GPC 1.85 g (7.2 mmol ) and DBTO (1.90 g, 7.6 mmol) in 2-propanol (30 ml) was heated under reflux for 6h. The resulting suspension was then cooled to 25° C in an ice bath and TEA (1.2 ml, 7.9 mmol) and oleoyl chloride (2.1 g, 7.9 mmol) were added. The reaction was stirred for 35 min at room temperature. A sample of the reaction mixture was analysed (HPLC) and shown to contain 1-oleoyl-LPC and GPC in a ratio 95 : 5. Isolation of the product was effected as previously described for the palmitoyl analogue.

<sup>1</sup>HNMR (400 MHz, CDCl<sub>3</sub>) 0.90 (t, J = 6.7 Hz, 3H), 1.20- 1.40 (m, 24H), 1.58 (m, 2H), 2.01 (m, 4H), 2.31 (t, J = 7.4 Hz, 2H), 3.36 (s, 9H), 3.82 (m, 2H), 3.87 (m, H), 3.96 (m, 2H), 4.09 (m, 2H), 4.37(m, 2H), 5.35 (m, 2H).

<sup>13</sup>CNMR (62.9 MHz, CDCl<sub>3</sub>) 14.1, 22.7, 25.0, 27.2, 29.2, 29.3, 29.5, 29.8, 31.9, 34.1, 54.3, 59.4, 65.1, 66.1, 67.2, 68.6, 129.6, 130.0, 173.9.

### **1-O-dodecanoyl-*sn*-glycero-3-phosphocholine**

A suspension of GPC (1.85 g, 7.2 mmol ) and dibutyltin oxide (1.90 g, 7.6 mmol) in 2-propanol (30 ml) was heated under reflux for 2h. The resulting suspension was then cooled to 25° C in an ice bath and TEA (1.2 ml, 7.9 mmol) and lauroyl chloride (1.6 g 7.9 mmol) were added. The reaction was stirred for 35 min at room temperature. A sample of the reaction mixture was analysed (HPLC) and shown to contain 1-lauroyl-LPC and GPC in a ratio 95 : 5. Isolation of the product was

effected as previously described for the palmitoyl analogue.

<sup>1</sup>HNMR (400 MHz, CD<sub>3</sub>OD) 0.90 (t, J = 6.7 Hz, 3H), 1.20 (m, 16 H), 1.62 (m, 2H), 2.35 (t, J = 7.4 Hz, 2H), 3.23 (s, 9H), 3.65 (m, 2H), 3.89 (m, 2H), 3.97 (m, 1H), 4.11 (dd, J = 11.5 and 6 Hz 1H), 4.18 (dd, J = 11.5 and 4.5 Hz, 1H), 4.30 (m, 2H).

<sup>13</sup>CNMR (62.9 MHz CD<sub>3</sub>OD) 14.5, 23.8, 25.9, 30.2, 30.5, 30.6, 30.7, 33.0, 34.8, 54.6 (t, J = 3.5 Hz), 60.4 (d, J = 5.0 Hz), 66.2, 67.3 (dt, J = 7.0 and 3.5 Hz), 67.8 (d, J = 5.6 Hz), 69.7 (d, J = 5.6 Hz), 175.2.

### **1-O-hexadecanoyl-*sn*-glycero-3-phosphoric acid DMAP salt**

10 g of glycerol-3-phosphate disodium salt was dissolved in 20 ml of H<sub>2</sub>O and passed through a column of sulphonic resin DOWEX 50X8 in the acidic form. The solution was treated with DMAP to pH = 6 and the solution lyophilised giving glycerol-3-phosphate DMAP mono salt.

GPA DMAP mono salt (1 g, 5.4 mmol) and DBTO (1.35 g, 3.4 mmol) in 2-propanol (50 ml) was heated under reflux for 2h. The resulting suspension was then cooled to 25° C in an ice bath and TEA (1.3 ml, 8.1 mmol) and palmitoyl chloride (2.2 g, 8.1 mmol) were added dropwise. The reaction was stirred for 15 min at room temperature. A sample of the reaction mixture was analysed (HPLC) and shown to contain 1-palmitoyl-LPA and GPA in a ratio 91 : 9. An analytical sample was obtained by column chromatography.

<sup>1</sup>HNMR (400 MHz, CD<sub>3</sub>OD) 0.90 (t, J = 6.7 Hz, 3H), 1.20-1.40 (m, 24H), 1.62 (m, 2H), 2.34 (t, J = 7.4 Hz, 2H), 3.26 (s, 6H), 3.91 (m, 2H), 3.97 (m, 1H), 4.11 (dd, J = 11.5 and 6 Hz, 1H), 4.18 (dd, J = 11.5 and 4.5 Hz, 1H), 7.00 (m, 2H), 8.13 (m, 2H).

<sup>13</sup>CNMR (100 MHz CD<sub>3</sub>OD) 14.8, 23.6, 25.9, 30.2, 30.30, 30.5, 30.6, 32.9, 34.9, 40.3, 47.8, 66.4, 67.4, 70.1, (dt, J = 7.0 and 3.5 Hz), 108.3, 140.3, 158.5, 175.2.

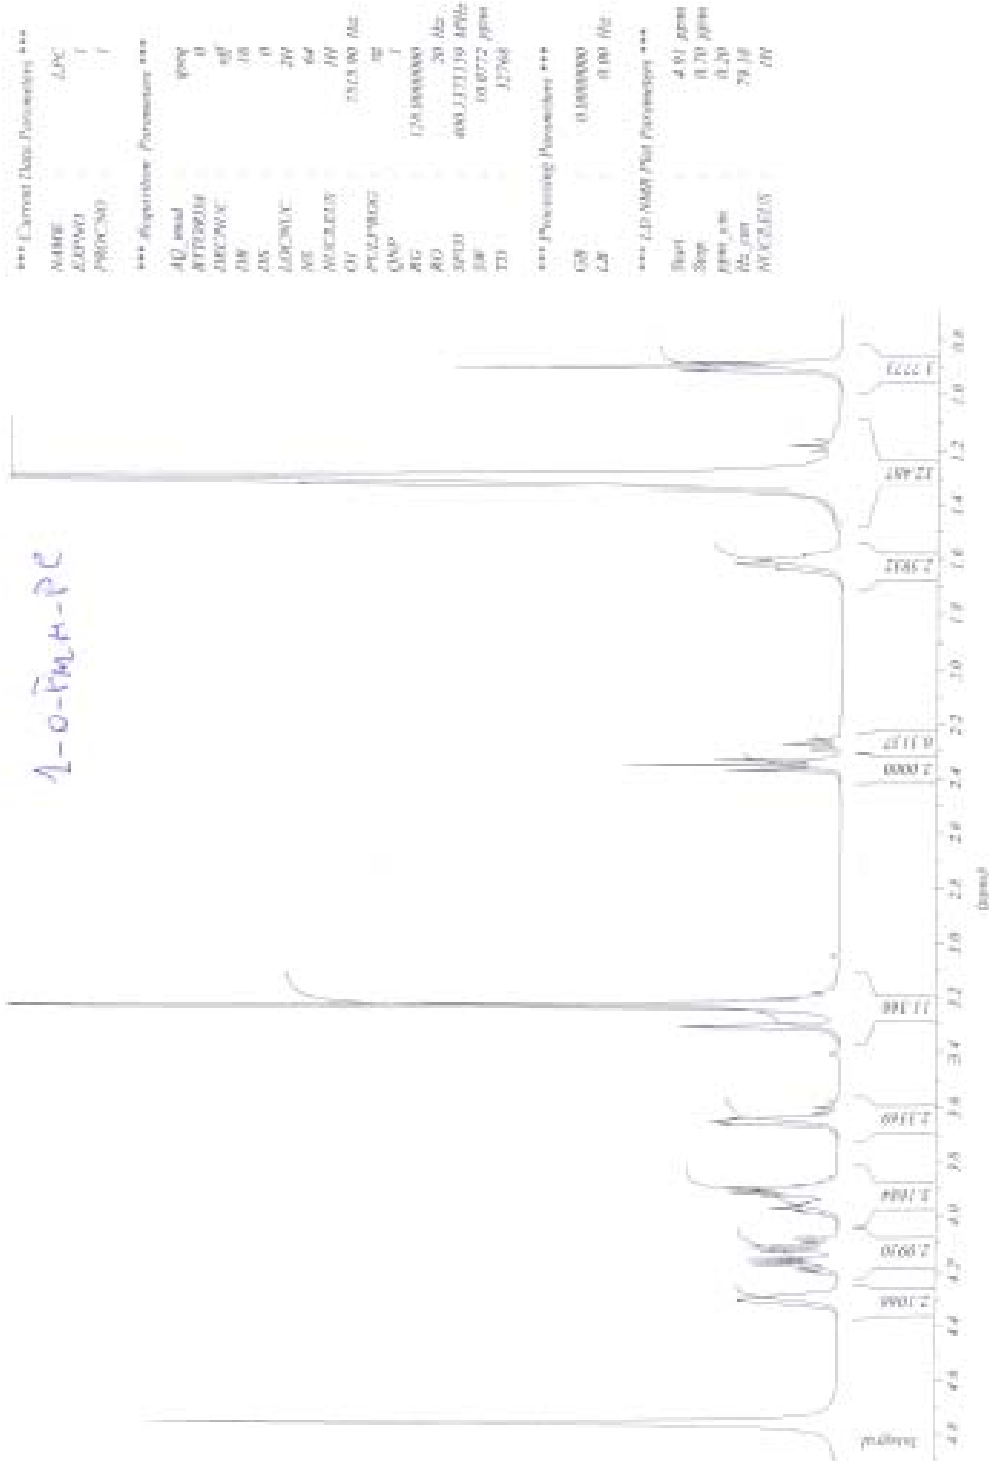

\*\*\* Current Data Parameters \*\*\*

NAME : LPC  
 EXPNO : 2  
 PROCNO : 1

\*\*\* Acquisition Parameters \*\*\*

AQ\_msd : qsim  
 BYTORDA : 0  
 DECNUC : 1H  
 DBR : 16  
 DS : 2  
 LOCNUC : 2H  
 NS : 271  
 NUCLEUS : 13C  
 O1 : 16773.71 Hz  
 PULPROG : zgpg  
 QNP : 1  
 RG : 45560.0000000  
 RO : 20 Hz  
 SFO1 : 100.6267737 MHz  
 SW : 261.3168 ppm  
 TD : 32768

\*\*\* Processing Parameters \*\*\*

GB : 0.0000000  
 LB : 1.00 Hz

\*\*\* 1D NMR Plot Parameters \*\*\*

Start : 183.60 ppm  
 Stop : -5.18 ppm  
 ppm\_cm : 8.90  
 Hz\_cm : 895.94  
 NUCLEUS : 13C

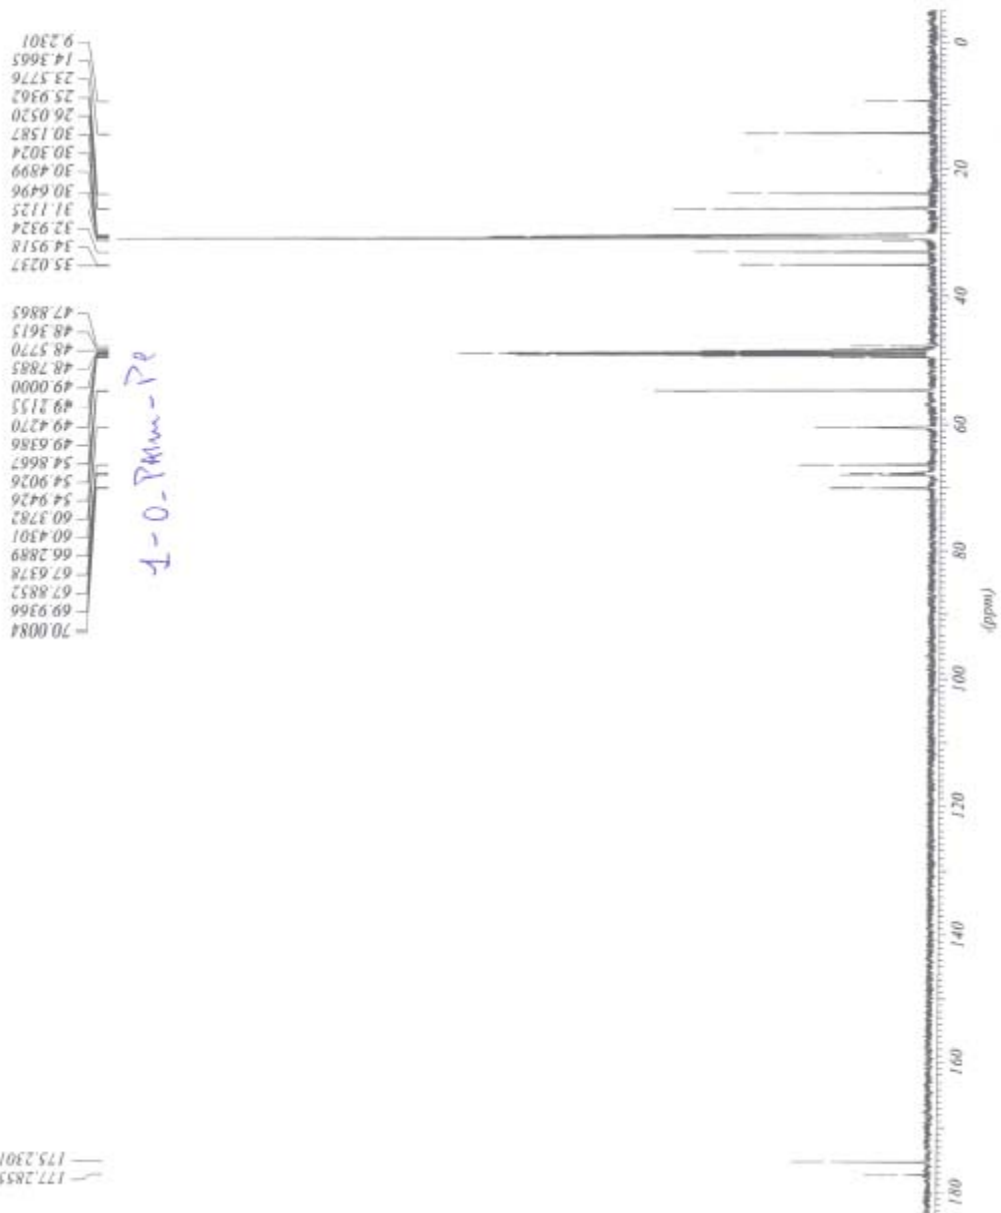



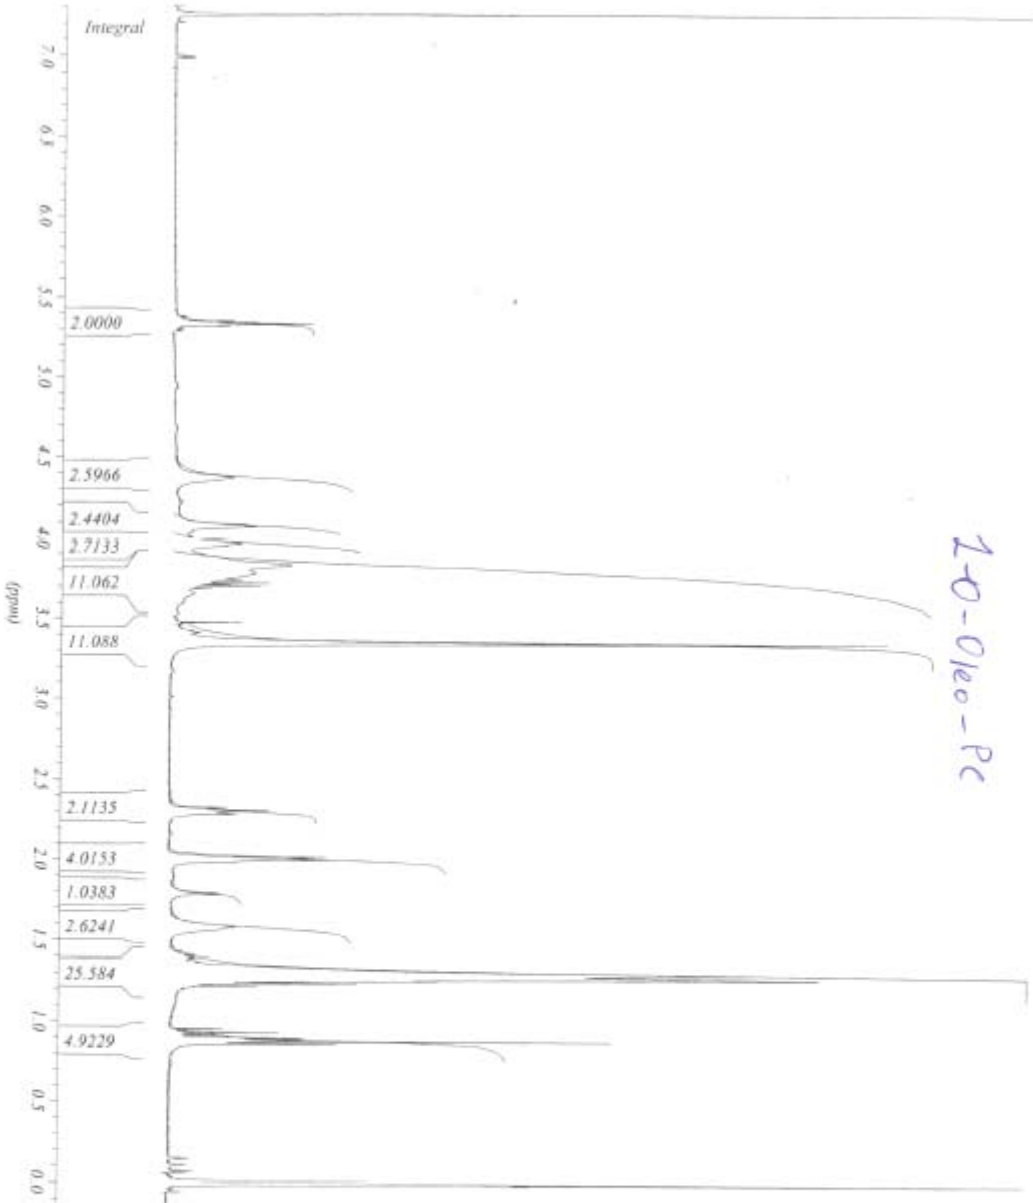

1-O-oleo-PC

\*\*\* Current Data Parameters \*\*\*  
 NAME : OLEIC  
 EXPNO : 1  
 PROCNO : 1

\*\*\* Acquisition Parameters \*\*\*  
 AQ\_mod : gseq  
 BTORDB : 0  
 DECNLC : off  
 DR : 16  
 DS : 0  
 LOCKNL : 2H  
 NS : 32  
 NUCLEUS : 1H  
 O1 : 5780.95 Hz  
 PULPROG : zgpg  
 QNP : 1  
 RG : 256.0000000  
 RO : 20 Hz  
 SFO1 : 400.1357809 MHz  
 SW : 4.3864 ppm  
 TD : 32768  
 TE : 300.0 K

\*\*\* Processing Parameters \*\*\*  
 GB : 0.0000000  
 LB : 0.00 Hz

\*\*\* 1D NMR Plot Parameters \*\*\*  
 Start : 7.11 ppm  
 Stop : -0.13 ppm  
 ppm\_min : 0.35  
 Hz\_min : 140.55  
 NUCLEUS : 1H

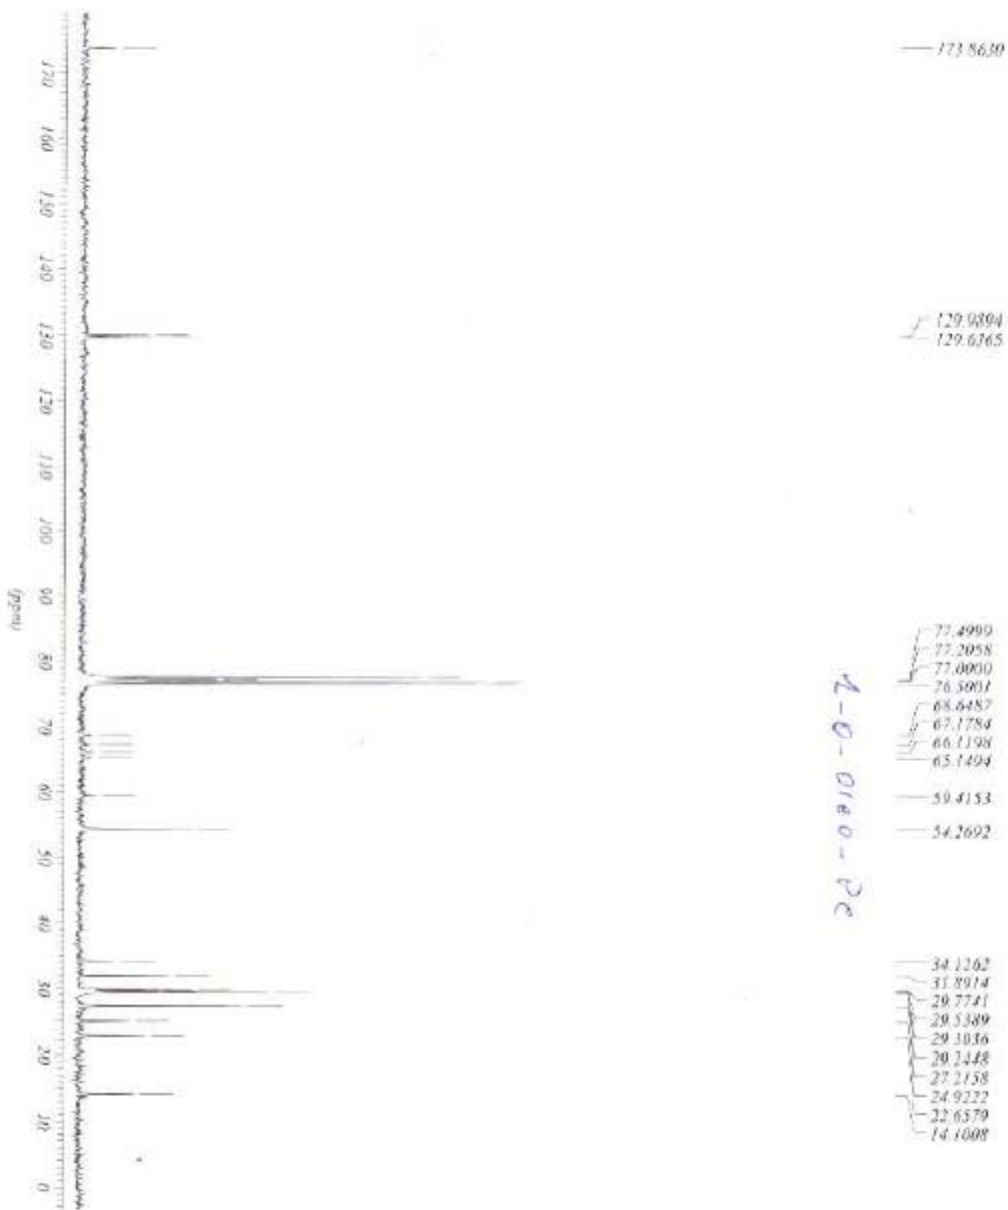

- 172.8620
- 129.9894
- 129.6265
- 77.4990
- 77.2058
- 77.0000
- 76.5001
- 68.6487
- 67.1784
- 66.1198
- 65.1494
- 59.4153
- 54.2692
- 34.1262
- 31.8914
- 29.7741
- 29.5389
- 29.1036
- 29.1448
- 27.2158
- 24.9222
- 22.6579
- 14.1008

4-O-0180-PC

\*\*\* Current Data Parameters \*\*\*

NAME : OLEIC  
 EXPNO : 101  
 PROCNO : 1

\*\*\* Acquisition Parameters \*\*\*

ACQ mode : freq  
 DS : 0  
 LOGNAME : raw.k9  
 NS : 11728  
 ACQDATE : Nov 2  
 CJ : 53100.09 Hz  
 PULPROG :  
 RO : 20 Hz  
 SFO1 : 62.906517 MHz  
 SF : 240.8667 ppm  
 TD : 16384  
 TE : 303 K

\*\*\* Processing Parameters \*\*\*

GB : 0.1000000  
 LR : 2.00 Hz

\*\*\* 1D NMR P101 Parameters \*\*\*

Start : 179.24 ppm  
 Stop : 4.69 ppm  
 gain : 8.63  
 Hs cm : 542.74  
 ANTICLS : ?

1-O-Straw-Pe

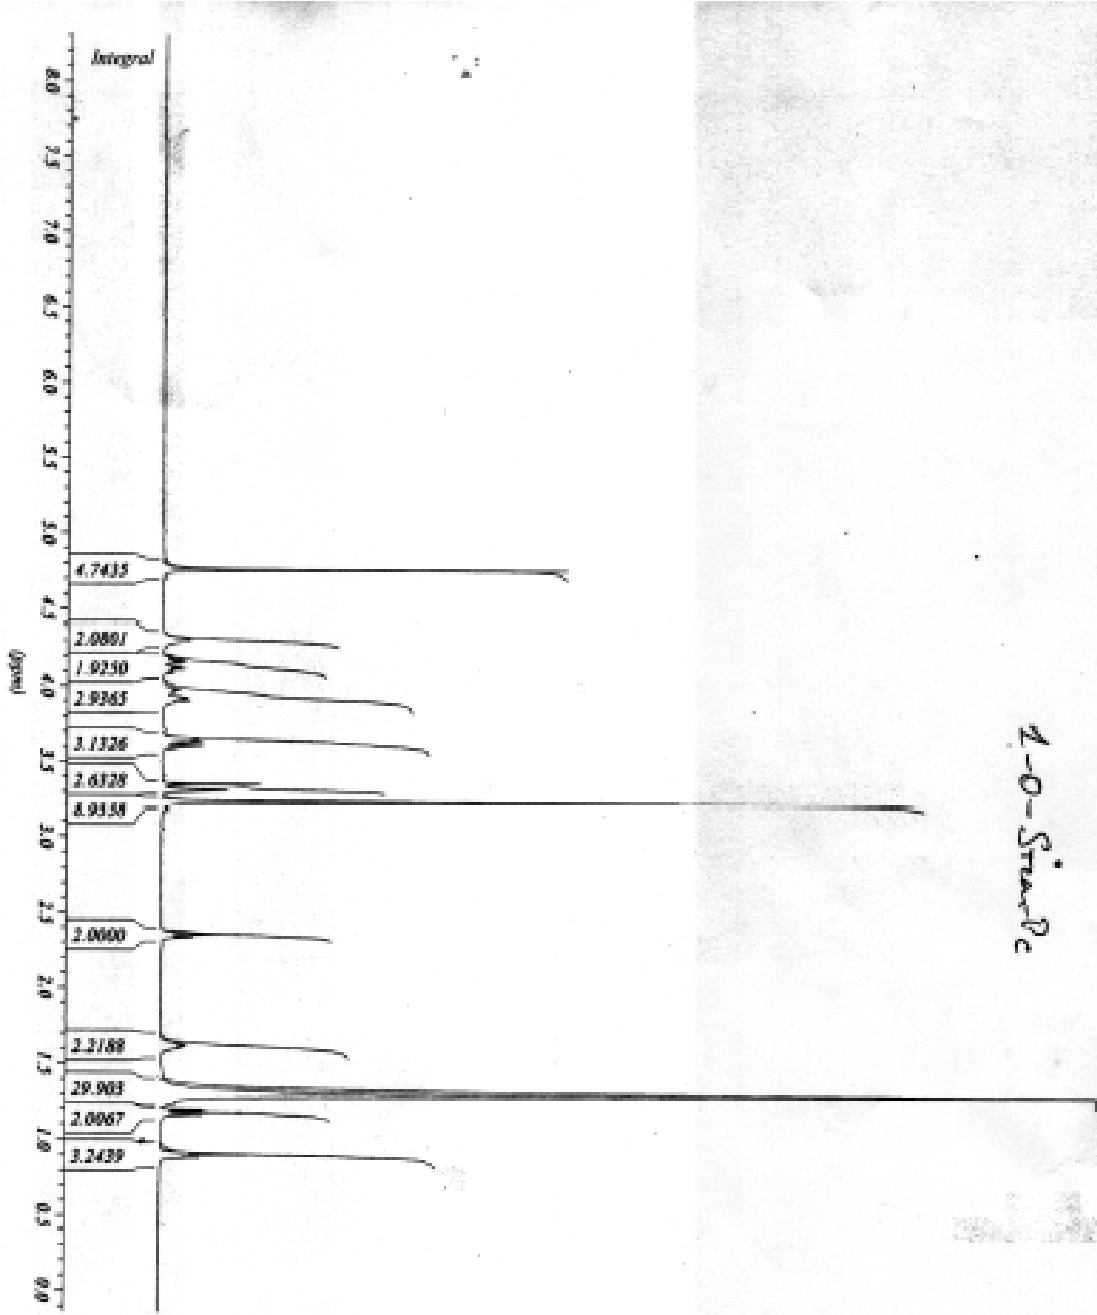

```

*** Current Data Parameters ***
NAME      : STELJPC
EXPNO    : 1
PROCNO   : 1

*** Acquisition Parameters ***
AQ      : 400.1335159 MHz
PULPROG : zgpg
RG      : 1801.0000000
RO      : 20 Hz
SF      : 400.1335159 MHz
SR      : 10.0772 ppm
TD      : 32768
TE      : 300.0 K

*** Processing Parameters ***
GB      : 0.0000000
LB      : 0.00 Hz

*** 1D NMR Post Parameters ***
Sstart  : 8.31 ppm
Sstop   : 0.14 ppm
ppm_0m  : 0.40
F2_0m   : 159.40
NUC1     : 1H
  
```

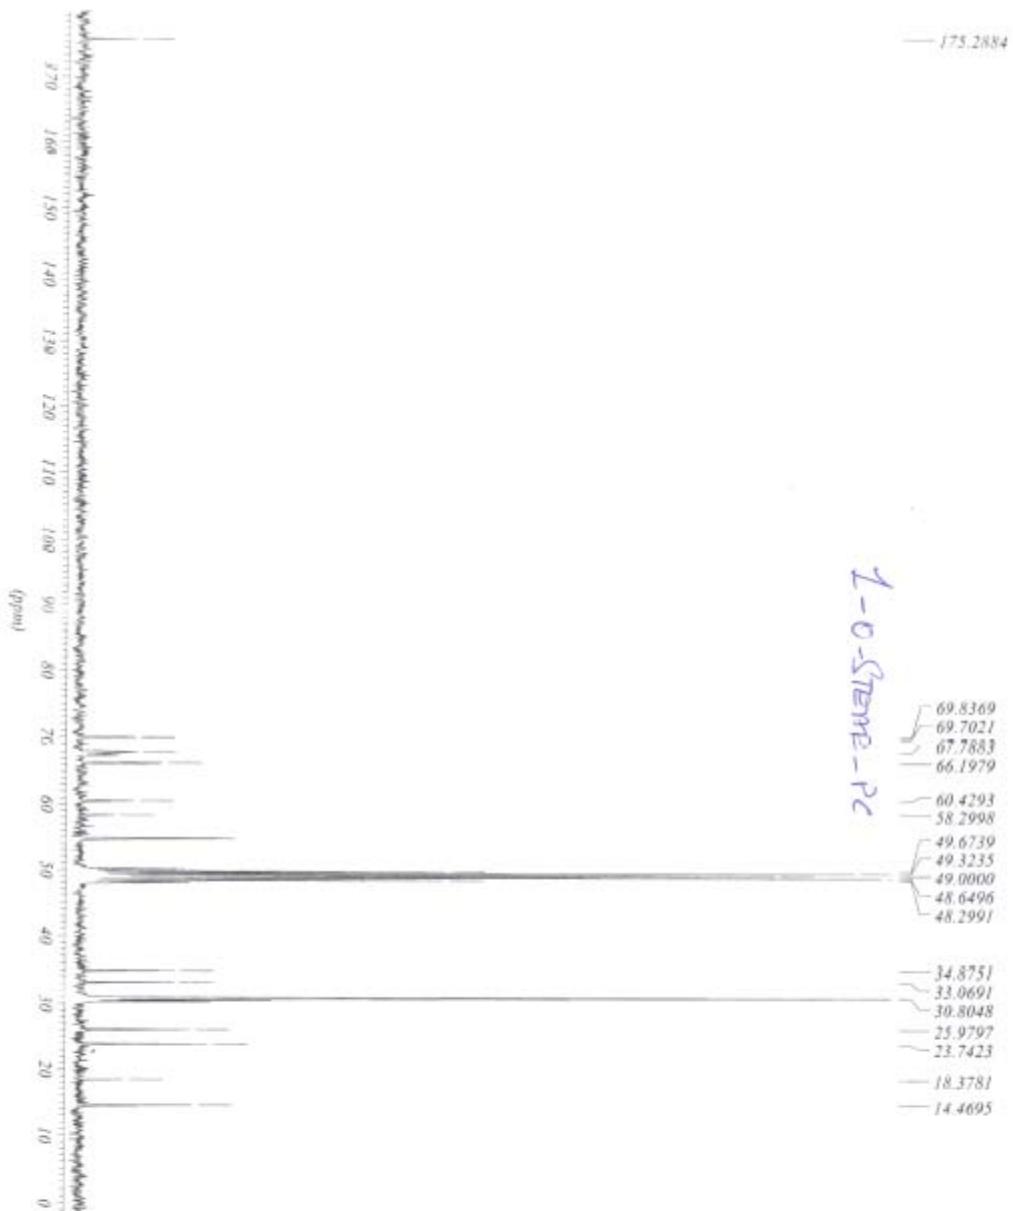

\*\*\* Current Data Parameters \*\*\*

|        |         |
|--------|---------|
| NAME   | STFALPC |
| EXPNO  | 101     |
| PROCNO | 1       |

\*\*\* Acquisition Parameters \*\*\*

|         |                |
|---------|----------------|
| AQ mod  | qsig           |
| DS      | 0              |
| LOGN/C  | Lock ?         |
| NS      | 3870           |
| NUCLEUS | Nuc ?          |
| Q1      | 2477.00 Hz     |
| PULPROG |                |
| RO      | 20 Hz          |
| SFO1    | 62.9024770 MHz |
| SW      | 220.8216 ppm   |
| TD      | 16384          |
| TE      | 303 K          |

\*\*\* Processing Parameters \*\*\*

|    |           |
|----|-----------|
| GB | 0.0000000 |
| LB | 2.00 Hz   |

\*\*\* 1D NMR Plot Parameters \*\*\*

|         |            |
|---------|------------|
| Start   | 1.7957 ppm |
| Stop    | 1.46 ppm   |
| ppm_fm  | 8.54       |
| Hz_fm   | 537.10     |
| NUCLEUS |            |

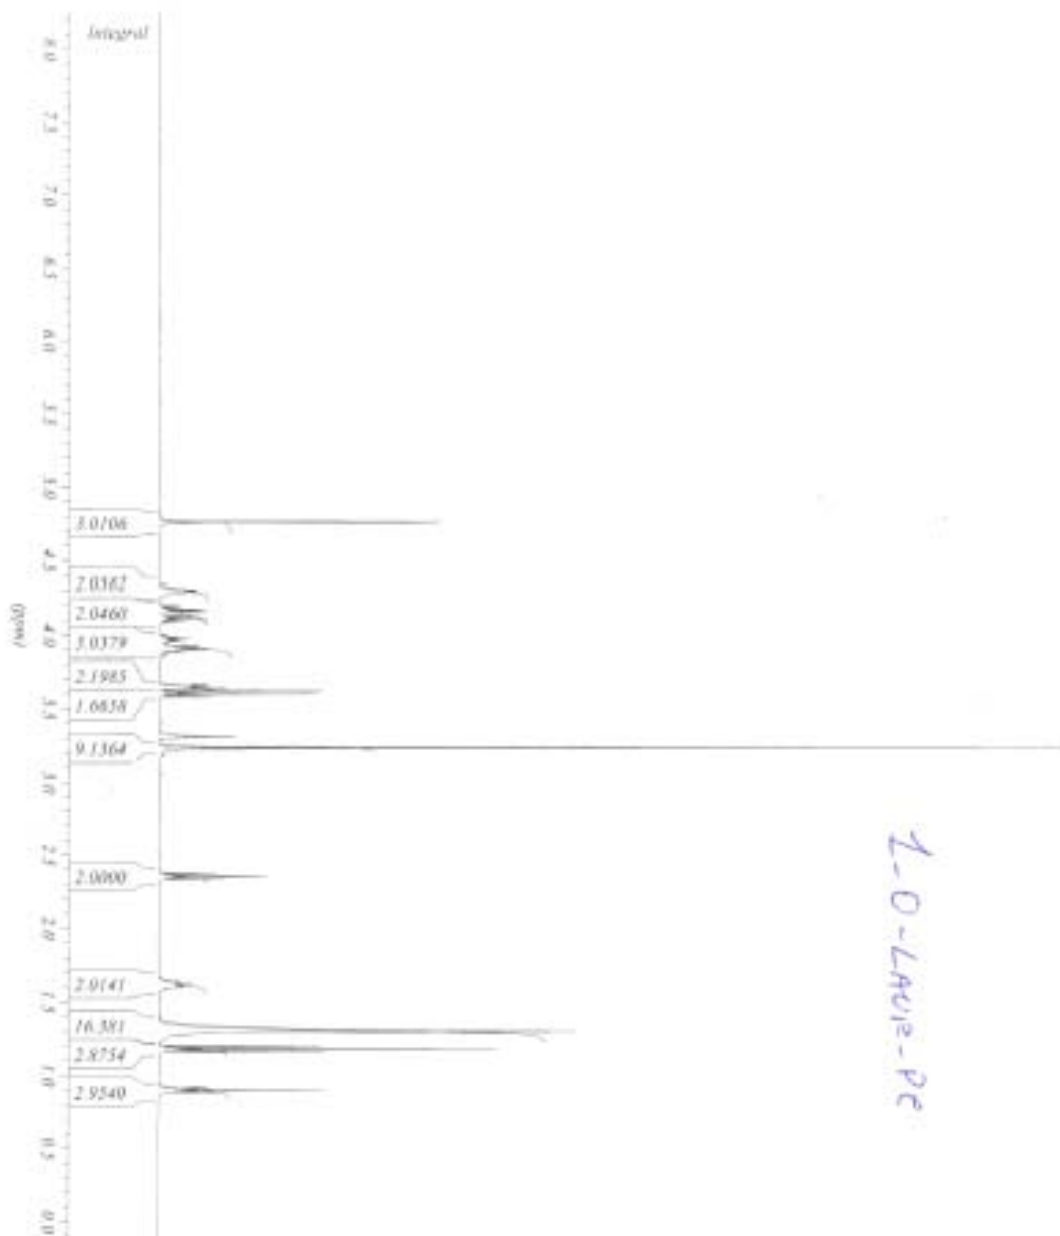

\*\*\* Current Data Parameters \*\*\*  
 NAME : L111.PC  
 EXTNO : 1  
 PROCNO : 1

\*\*\* Acquisition Parameters \*\*\*  
 AQ mod : gpcg  
 RTTORDI : 0  
 DSCHN : gff  
 DSF : 16  
 DS : 0  
 LORCH : 2H  
 NS : 32  
 NS2 : 1H  
 OI : 7293.04 Hz  
 PULPROG : zgpg  
 QNP : 1  
 RG : 128.0000000  
 RO : 20 Hz  
 SFO1 : 400.147950 MHz  
 SW : 10.0772 Hz  
 TD : 32768  
 TE : 300.0 K

\*\*\* Processing Parameters \*\*\*  
 GB : 0.0000000  
 LB : 0.00 Hz

\*\*\* 1D NMR Raw Parameters \*\*\*  
 Date : 8.27.99  
 Shift : -0.13 ppm  
 PPM : 0.40  
 HC : 158.53  
 NUCLEON : 1H

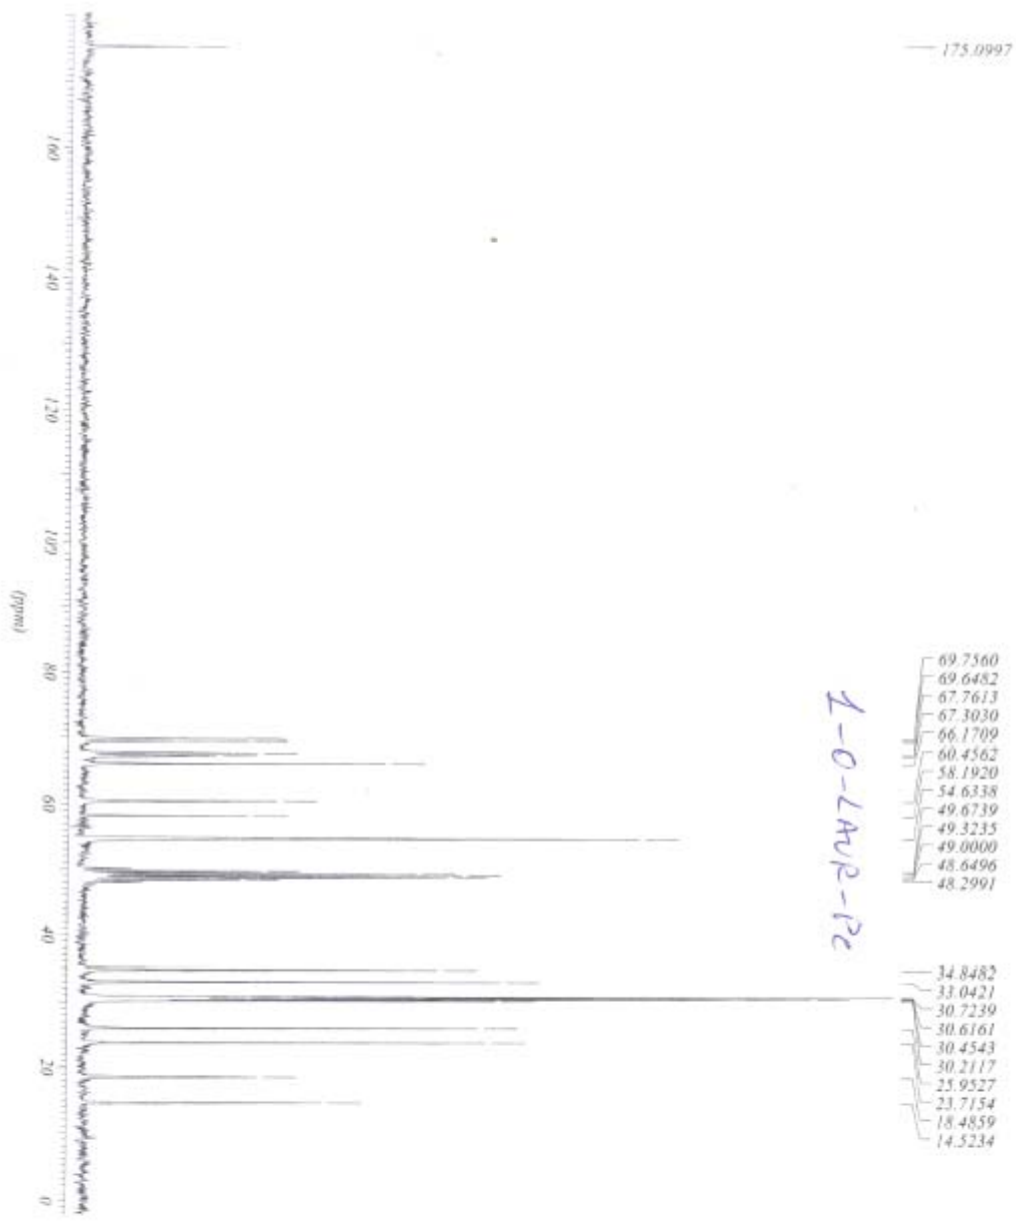

- 69.7560
- 69.6482
- 67.7613
- 67.3030
- 66.1709
- 60.4562
- 58.1920
- 54.6338
- 49.6739
- 49.3235
- 49.0000
- 48.6496
- 48.2991
  
- 34.8482
- 33.0421
- 30.7239
- 30.6161
- 30.4543
- 30.2117
- 25.9527
- 23.7154
- 18.4859
- 14.5234

\*\*\* Current Data Parameters \*\*\*

|        |             |
|--------|-------------|
| NAME   | 1-O-LAMP-PC |
| EXPNO  | 102         |
| PROCNO | 1           |

\*\*\* Acquisition Parameters \*\*\*

|          |                |
|----------|----------------|
| AQ_msd   | freq           |
| DS       | 0              |
| LOCNUC   | lock ?         |
| NS       | 1333           |
| NUCLEUS  | Nuc ?          |
| OL       | 2477.00 Hz     |
| PCULPROG |                |
| RO       | 20 Hz          |
| SFO1     | 62.9024770 MHz |
| SW       | 220.8236 ppm   |
| TD       | 16384          |
| TE       | 303 K          |

\*\*\* Processing Parameters \*\*\*

|    |           |
|----|-----------|
| GB | 0.0000000 |
| LB | 1.00 Hz   |

\*\*\* 1D NMR P10r Parameters \*\*\*

|         |            |
|---------|------------|
| Start   | 180.36 ppm |
| Stop    | -2.14 ppm  |
| ppm_cen | 8.61       |
| Hz_cen  | 541.42     |
| NUCLEUS | ?          |

1-O-PRM-PR

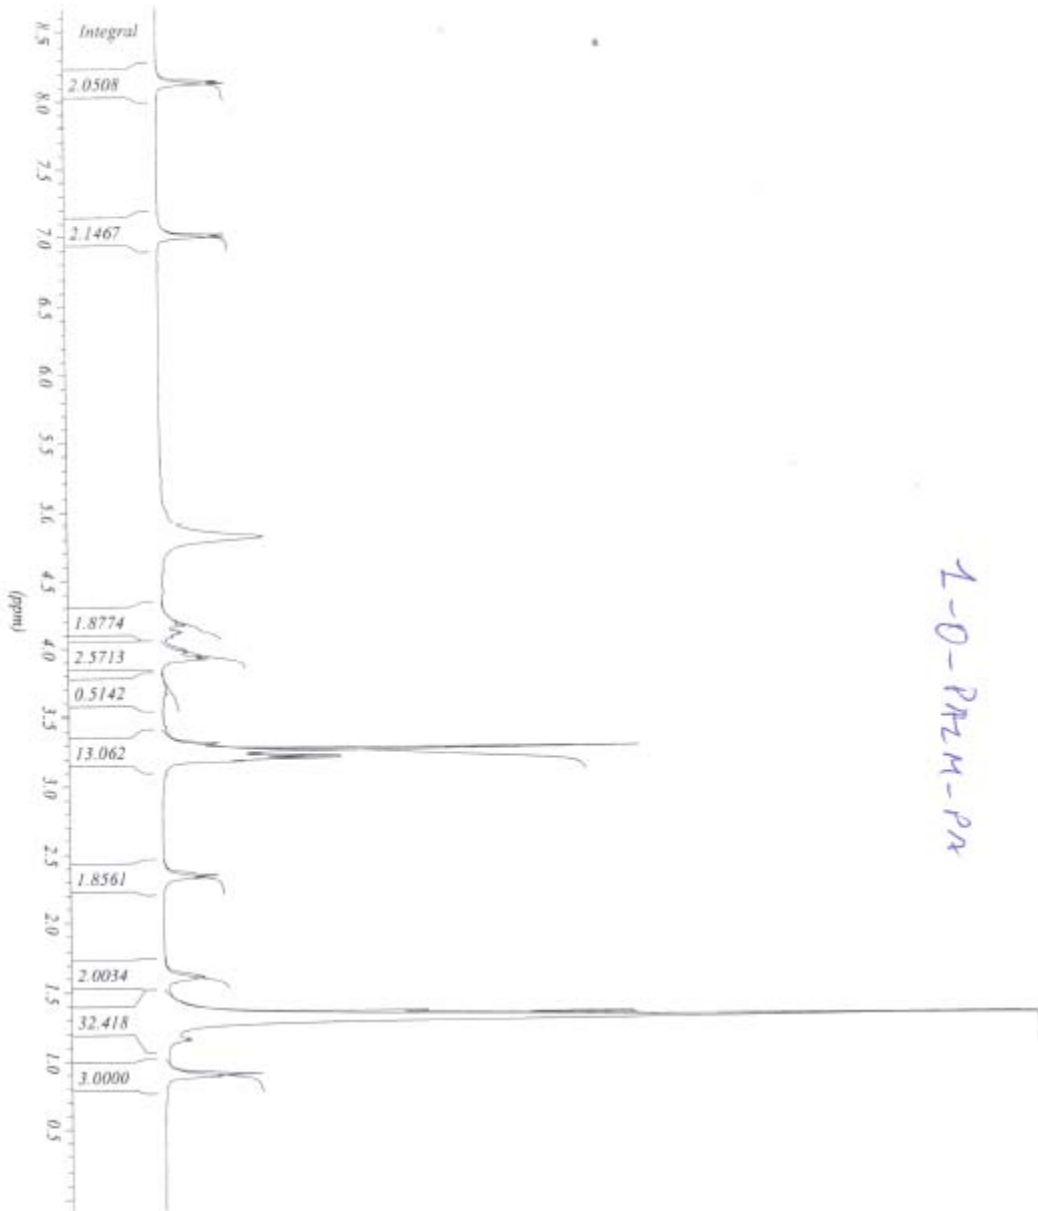

```

*** Current Data Parameters ***
NAME      : LP4
EXPNO    : 1
PROCNO   : 1

*** Acquisition Parameters ***
AQ mod   : gpcq
BYTORDA : 0
DECNUC   : ofp
DR       : 16
DS       : 0
LOCNUC   : 2H
NS       : 64
NUCLEUS  : 1H
O1       : 7515.90 Hz
PULPROG  : zg
RG       : 1
SFO1     : 256.0000000
SF01     : 400.1375159 MHz
SW       : 10.0772 ppm
TD       : 32768

*** Processing Parameters ***
GB       : 0.00000000
LB       : 0.00 Hz

*** 1D NMR Plot Parameters ***
Start    : 8.66 ppm
Stop     : -0.09 ppm
ppm_cm   : 0.41
Hz_cm    : 165.26
NUCLEUS  : 1H
  
```

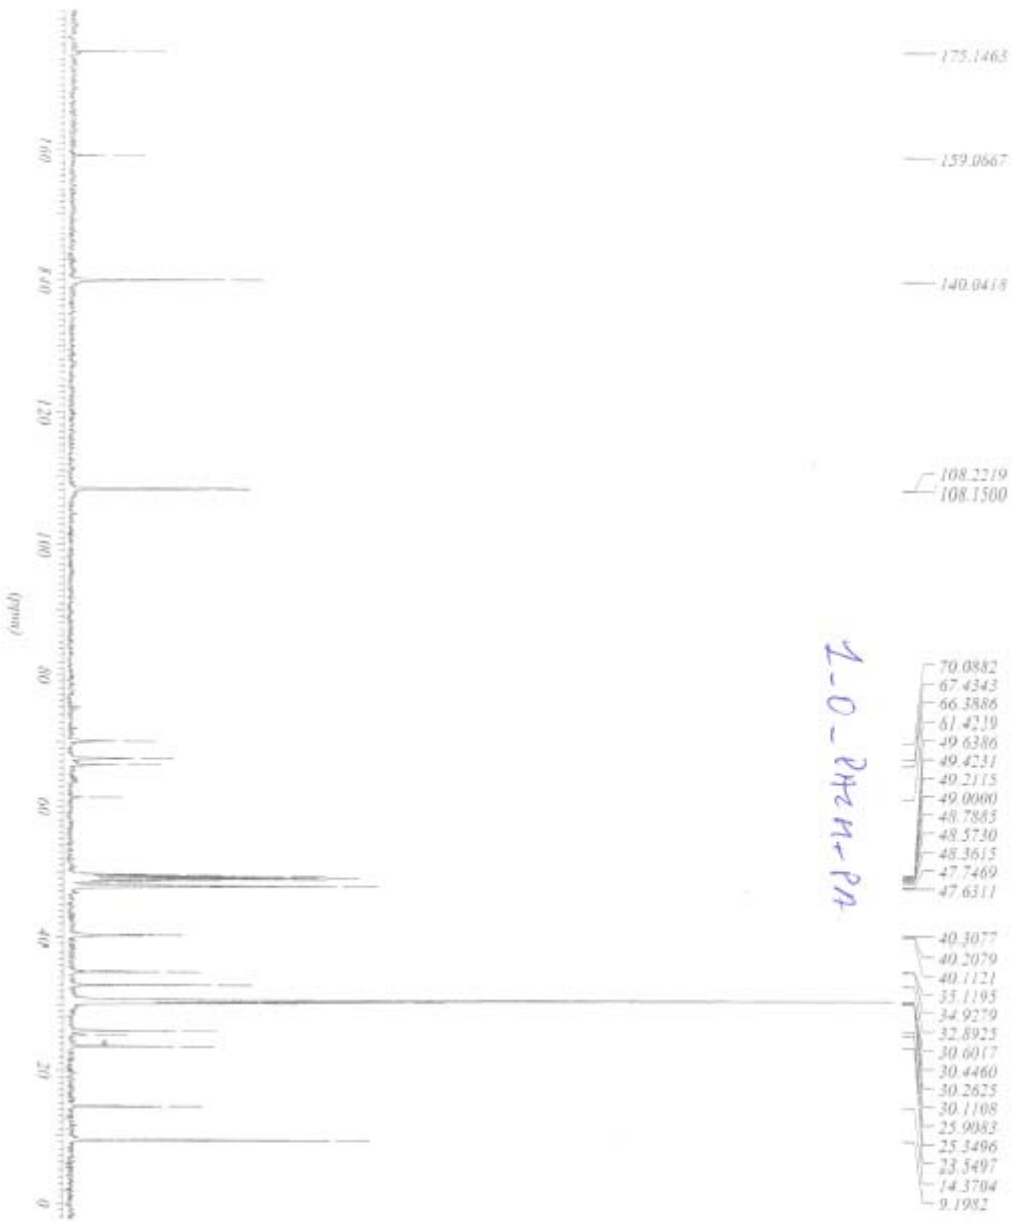

```

*** Current Data Parameters ***
NAME      : 13C
EXPNO    : 702
PROCNO   : 1

*** Acquisition Parameters ***
AQ mod   : 0      gpm
BITWORD  : 0
DECIMIC  : 1H
DR       : 16
DS       : 2
EQUATIC  : 0
NS       : 854
NUCLEUS  : 13C
OI       : 16771.71 Hz
PULPROG  : zgpg
RG       : 1
SFO      : 100.6267737 MHz
WDW      : EM
GB       : 0
PC       : 45.500 0000000
RG       : 30 Hz
SFO      : 100.6267737 MHz
GB       : 0
PC       : 261.5168 ppm
TD       : 32768

*** Processing Parameters ***
GB       : 0.00000000
LB       : 2.00 Hz

*** 1D NMR Plot Parameters ***
Start    : 181.18 ppm
Stop     : -2.51 ppm
pnm_cou  : 8.67
He_cou   : 871.89
NUCLEUS  : 13C
  
```



Spectrum Plot

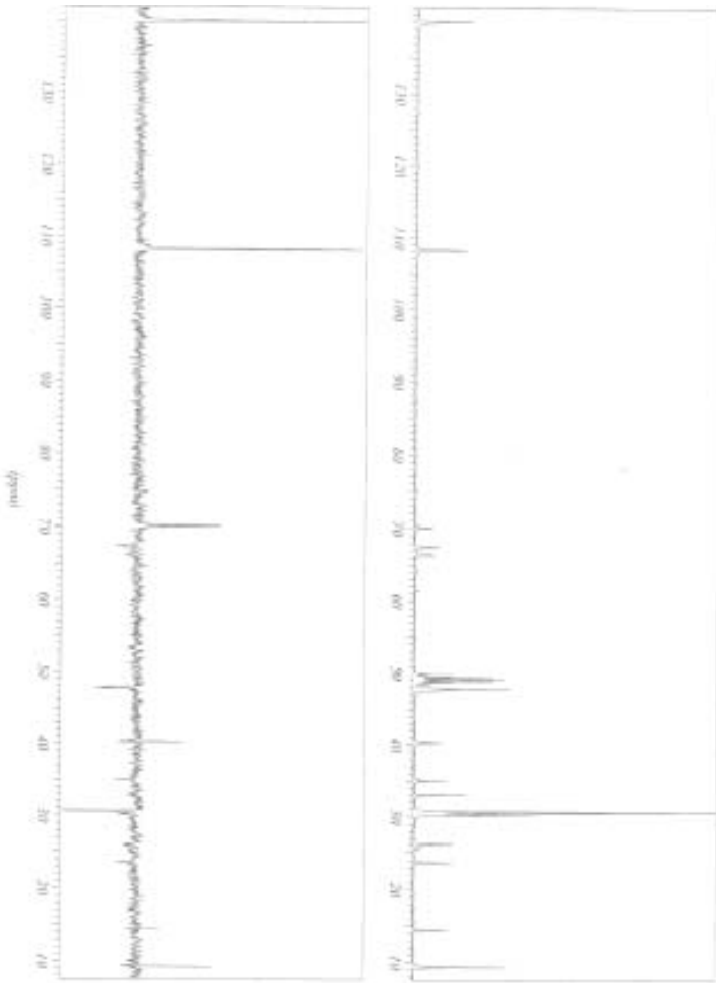

Fig. 1. <sup>13</sup>C-NMR spectrum of 1-O-AR2H, Pd

Fig. 2. <sup>13</sup>C-NMR spectrum of 1-O-AR2H, Pd

1-O-AR2H, Pd  
<sup>13</sup>C DEPT

# Display Report

**Analysis Info**

Analysis Name: **se\_cley/Hpc:d**  
 Sample Name: **se\_cley/Hpc**  
 Comment: **se\_oryl-hpc 1 mL-> 10 microL/L1 mL MeOH**  
**Richthofens Drogen**

Acquisition Date: **05/29/06 14:43:31**  
 Method: **Copy of \_sm012.MS**

Operator: **Walter Panzerl**  
 Instrument: **esquire3000plus**

**Acquisition Parameter**

|                 |            |                 |           |              |           |                          |       |
|-----------------|------------|-----------------|-----------|--------------|-----------|--------------------------|-------|
| Ion Source Type | ESI        | Mass Range Mode | ScanRange | Ion Polarity | Positive  | Alternating Ion Polarity | off   |
| Scan Begin      | 50 m/z     | Scan End        | 1100 m/z  | Average      | 5 Spectra | Acquisition Time         | 33 µs |
| Collision Exit  | 128.2 Volt | Scan 1          | 40.0 Volt | Top One      | 47.0      | Auto MS/MS               | off   |

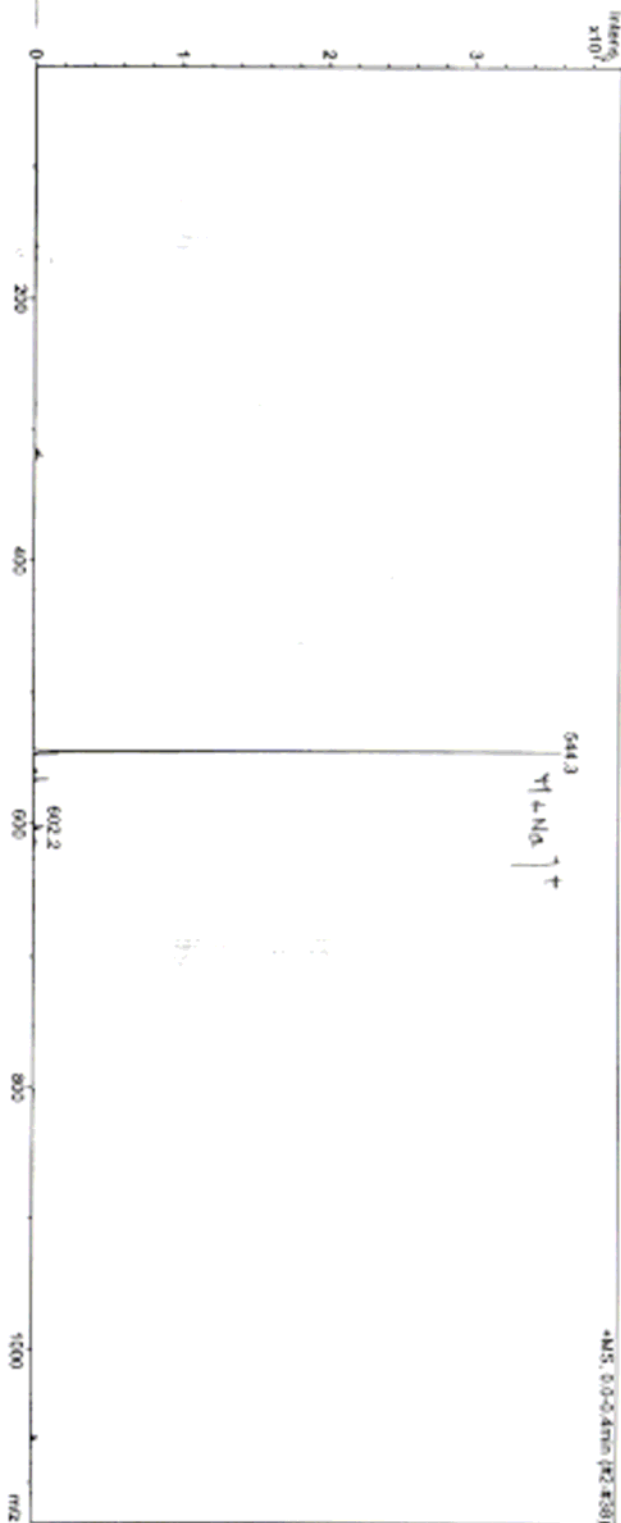

# Display Report

## Analysis Info

Analysis Name: se\_laurlpc\_d  
 Sample Name: se\_laurlpc\_  
 Comment: se\_laurlpc\_1 mL -> 10 microL/1 mL MeOH+HCOOH 0.1%  
 Richiedente D'arrigo

Acquisition Date: 05/31/06 14:37:11  
 Method: Copy of \_swall2.MS

Operator: Walter Panzeri  
 Instrument: esquire3000plus

## Acquisition Parameter

Ion Source Type: ESI  
 Scan Begin: 50 m/z  
 Capillary Exit: 130.2 Volt

Mass Range Mode: Std/Normal  
 Scan End: 600 m/z  
 Sirm 1: 40.0 Volt

Ion Polarity: Positive  
 Averages: 5 Spectra  
 Trap Drive: 48.8

Alternating Ion Polarity: off  
 Accumulation Time: 46 µs  
 Auto MS/MS: off

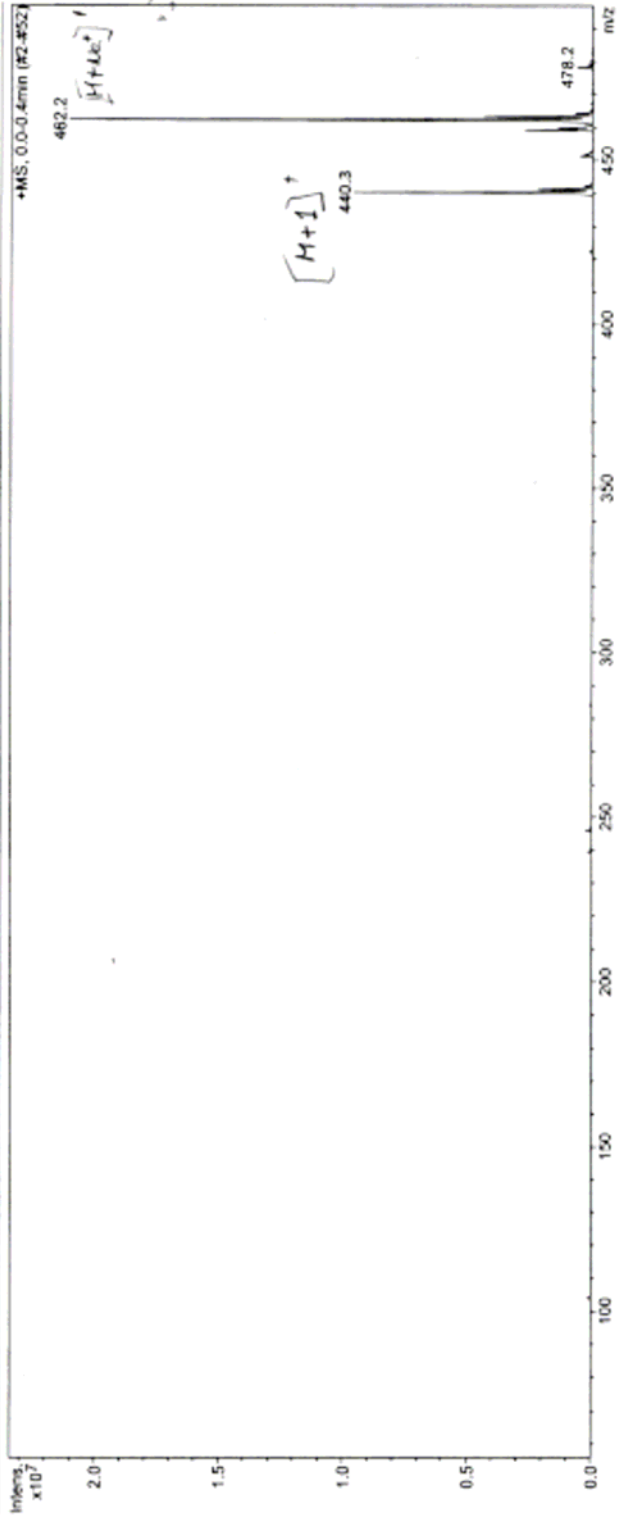

# Display Report

## Analysis Info

Analysis Name ee\_palmipcd780d6\_d  
 Sample Name ee\_palmipcd780d6  
 Comment ee\_palmipcd780d6 1 mL -> 10 microliters MeOH + hecosh 0.1%  
 Acquisition Date 05/25/06 14:29:29  
 Method Copy of \_swald2.MS  
 Operator Walter Parzani  
 Instrument esq4fw3000plus  
 Acquisition Parameters  
 Ion Source Type ESI  
 Scan Range Mode Scan Range Mode  
 Scan Begin 50 m/z  
 Scan End 1100 m/z  
 Capillary Volt 128.2 Volt  
 Slew 1  
 Ion Polarity Positive  
 Averages 5 Spectra  
 Trap Drive 47.0  
 Alternating Ion Polarity off  
 Acquisition Time 28 min  
 Capillary Volt 128.2 Volt  
 Slew 1  
 Ion Polarity Positive  
 Averages 5 Spectra  
 Trap Drive 47.0  
 Alternating Ion Polarity off  
 Acquisition Time 28 min

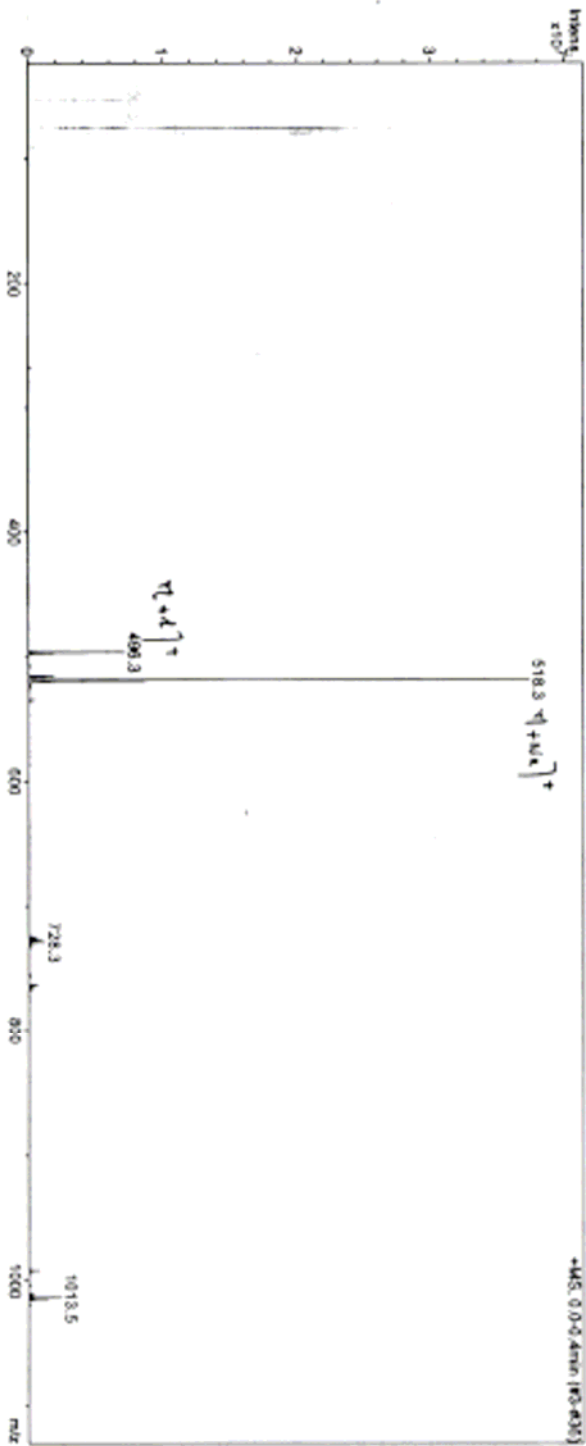

# Display Report

## Analysis Info

Analysis Name: se\_stearfpc\_d  
Sample Name: se\_stearfpc  
Comment: se\_stearfpc 1 mL -> 10 microL/1 mL MeOH+HCOOH 0.1%  
Richardente D'Arrigo

Acquisition Date: 05/31/06 14:31:19  
Method: Copy of \_swal12.MS

Operator: Walker Panzeri  
Instrument: esquire3000plus

## Acquisition Parameter

|                 |            |                 |           |              |           |                          |            |
|-----------------|------------|-----------------|-----------|--------------|-----------|--------------------------|------------|
| Ion Source Type | ESI        | Mass Range Mode | SddNormal | Ion Polarity | Positive  | Alternating Ion Polarity | off        |
| Scan Range      | 50 m/z     | Scan End        | 600 m/z   | Averages     | 5 Spectra | Accumulation Time        | 31 $\mu$ s |
| Capillary Exit  | 130.2 Volt | Skim 1          | 40.0 Volt | Trap Drive   | 48.8      | Auto MS/MS               | off        |

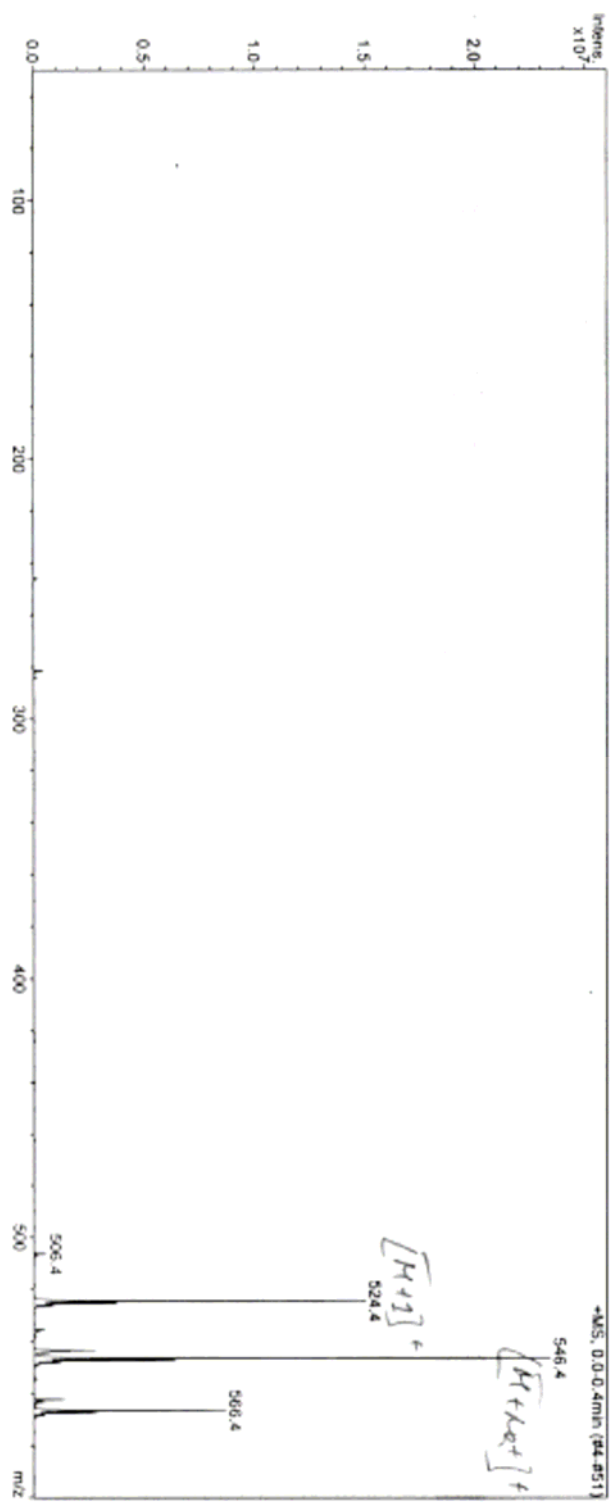



# HPLC trace example

Sample Name : cat155  
Acq. Operator : ezio  
Acq. Method : C:\HPCHEM\1\METHODS\FOSFOLIP.M  
Last changed : 11/02/03 14.29.01 by ezio  
(modified after loading)  
Analysis Method : C:\HPCHEM\1\METHODS\FOSFOLIP.M  
Last changed : 22/12/05 11.08.25 by paola  
(modified after loading)

analisi di fosfolipidi con stannani

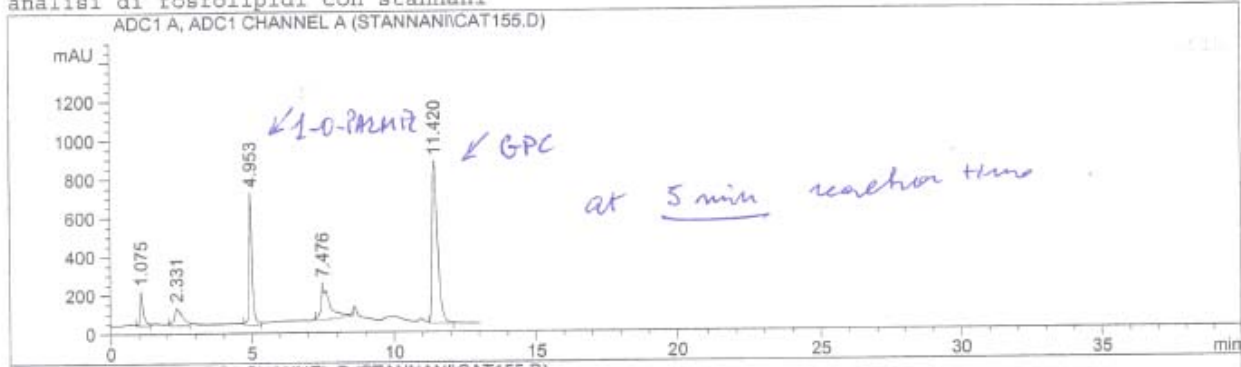

analisi di fosfolipidi con stannani

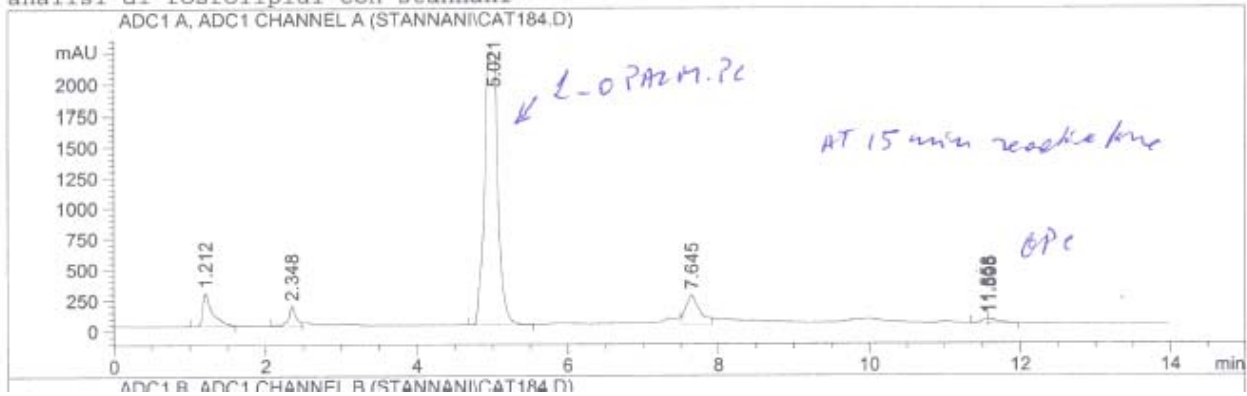

analisi di fosfolipidi con stannani

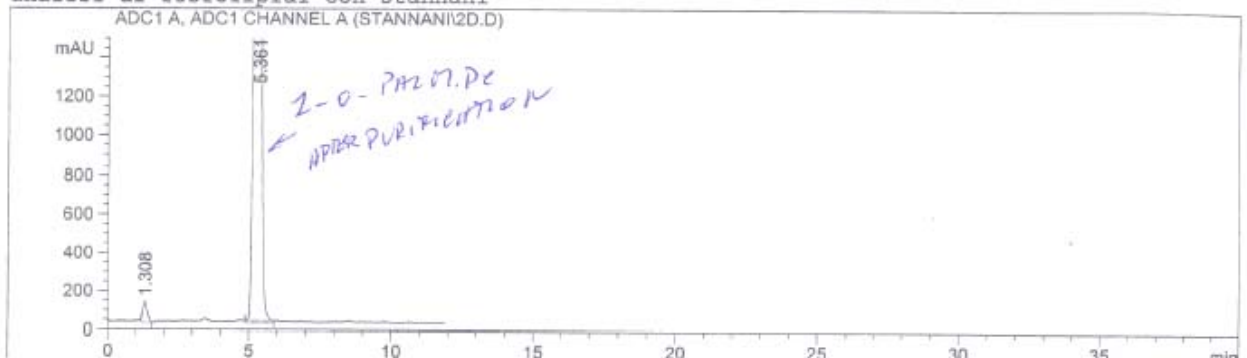

Supplement: b604636c.pdf [file b604636c.pdf]
